# Supplementary material for: Identification of Human P2X1 Receptor-interacting Proteins Reveals a Role of the Cytoskeleton in Receptor Regulation
Source: PubMed Central journal article supplement — J Biol Chem. 2011 Jul 7;286(35):30591–9. doi: 10.1074/jbc.M111.253153 (PMC3162419; doi:10.1074/jbc.m111.253153), 2011-07-07
Supplement: supp_M111.253153_jbc.M111.253153-1.pdf [file supp_M111.253153_jbc.M111.253153-1.pdf]

Table 1

| Protein                                                  | Gene ID | Pure (of 9) | Crosslinked (of 6) |
|----------------------------------------------------------|---------|-------------|--------------------|
| Heat shock 70 kDa protein 1                              | HSP71   | 8           | 6                  |
| Actin, cytoplasmic 1                                     | ACTB    | 7           | 6                  |
| Heat shock protein HSP 90-beta                           | HS90B   | 7           | 6                  |
| Kinesin-like protein KIF11                               | KIF11   | 7           | 2                  |
| Cytoskeleton-associated protein 4                        | CKAP4   | 5           | 5                  |
| Tubulin beta-2C chain                                    | TBB2C   | 5           | 5                  |
| Tubulin alpha-1B chain                                   | TBA1B   | 5           | 3                  |
| Tubulin beta chain                                       | TBB5    | 4           | 6                  |
| Vesicle-associated membrane protein-associated protein A | VAPA    | 3           | 3                  |
| Cytoplasmic dynein 1 heavy chain 1                       | DYHC1   | 2           | 4                  |
| Clathrin heavy chain 1                                   | CLH1    | 2           | 3                  |
| Filamin-A                                                | FLNA    | 2           | 3                  |
| Membrane-associated progesterone receptor component 1    | PGRC1   | 2           | 3                  |
| Myb-binding protein 1A                                   | MBB1A   | 2           | 2                  |
| Protein transport protein Sec61 subunit beta             | SC61B   | 2           | 2                  |

| Protein                                                        | Gene ID | Pure (of 9) | Crosslinked (of 6) |
|----------------------------------------------------------------|---------|-------------|--------------------|
| Heat shock cognate 71 kDa protein                              | HSP7C   | 1           | 6                  |
| Heat shock protein HSP 90-alpha                                | HS90A   | 1           | 6                  |
| Lamina-associated polypeptide 2, isoforms beta/gamma           | LAP2B   | 1           | 4                  |
| Heat shock protein 75 kDa, mitochondrial                       | TRAP1   | 1           | 3                  |
| Membrane-associated progesterone receptor component 2          | PGRC2   | 1           | 3                  |
| Ezrin                                                          | EZRI    |             | 6                  |
| Annexin A2                                                     | ANXA2   |             | 4                  |
| Neural cell adhesion molecule 1                                | NCAM1   |             | 4                  |
| Vesicular integral-membrane protein VIP36                      | LMAN2   |             | 4                  |
| Annexin A5                                                     | ANXA5   |             | 3                  |
| Annexin A6                                                     | ANXA6   |             | 3                  |
| Dynamin-like 120 kDa protein, mitochondrial                    | OPA1    |             | 3                  |
| Integrin beta-1                                                | ITB1    |             | 3                  |
| Lysosome membrane protein 2                                    | SCR2    |             | 3                  |
| Lysosome-associated membrane glycoprotein                      | LAMP1   |             | 3                  |
| Microtubule-associated protein 4                               | MAP4    |             | 3                  |
| Myristoylated alanine-rich C-kinase substrate                  | MARCS   |             | 3                  |
| Tubulin alpha-1A chain                                         | TBA1A   |             | 3                  |
| Cell adhesion molecule 1                                       | CADM1   |             | 3                  |
| Erlin-2                                                        | ERLN2   |             | 3                  |
| Dynein light chain 1, cytoplasmic                              | DYL1    |             | 2                  |
| Flotillin-2                                                    | FLOT2   |             | 2                  |
| Lysosome-associated membrane glycoprotein                      | LAMP2   |             | 2                  |
| MAGUK p55 subfamily member 6                                   | MPP6    |             | 2                  |
| Myosin light polypeptide 6                                     | MYL6    |             | 2                  |
| Protein transport protein Sec23A                               | SC23A   |             | 2                  |
| Vesicle transport through interaction with t-SNAREs homolog 1A | VTI1A   |             | 2                  |
| Vesicle-associated membrane protein-associated protein B/C     | VAPB    |             | 2                  |
| Vesicle-trafficking protein SEC22b                             | SC22B   |             | 2                  |

Table 1. P2X1 interacting cytoskeletal proteins. Using HisFLAG tagged human P2X1 as bait a number of interacting proteins were pulled down associated with P2X1 attached to anti-FLAG agarose beads. After washing the beads proteins were eluted with FLAG peptide and run on SDS PAGE. Protein bands were excised and identified on either 4000 Q-Trap system or Thermo Orbitrap (PNAAC, University of Leicester, UK). A hit protein was identified by a minimum of 3 peptides of  $\geq 95\%$  peptide identification probability and 99.9% protein identification probability using the Scaffold2 program (Proteome Software Inc., USA). Proteins labelled 'pure' were identified in runs without DSP crosslinker present and 'crosslinked' in runs where DSP was present.
