# Supplementary material for: Identification of Human P2X1 Receptor-interacting Proteins Reveals a Role of the Cytoskeleton in Receptor Regulation
Source: PubMed Central journal article supplement — J Biol Chem. 2011 Jul 7;286(35):30591–9. doi: 10.1074/jbc.M111.253153 (PMC3162419; doi:10.1074/jbc.m111.253153), 2011-07-07
Supplement: supp_M111.253153_jbc.M111.253153-2.pdf [file supp_M111.253153_jbc.M111.253153-2.pdf]

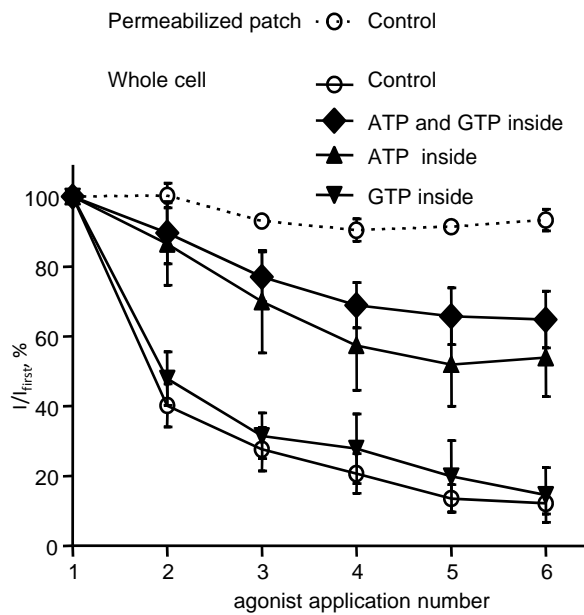

**Supplementary Figure 1. ATP but not GTP prevents P2X1 receptor mediated current run-down in the whole cell configuration.** Reproducible P2X1 mediated currents evoked by consecutive application of  $\alpha,\beta$ -meATP (10  $\mu$ M) were observed in permeabilised patch configuration (n=12), however considerable run-down was seen in the whole cell recording configuration. Addition of GTP (0.5 mM) and/or ATP (5 mM) into the internal solution in whole cell recording configuration decreased current run-down (n=7-10). Addition of GTP (0.5 mM) alone to the internal solution in whole cell configuration had no effect on run-down (n=7-10).
