# Supplementary material for: Identification of Human P2X1 Receptor-interacting Proteins Reveals a Role of the Cytoskeleton in Receptor Regulation
Source: PubMed Central journal article supplement — J Biol Chem. 2011 Jul 7;286(35):30591–9. doi: 10.1074/jbc.M111.253153 (PMC3162419; doi:10.1074/jbc.m111.253153), 2011-07-07
Supplement: supp_M111.253153_jbc.M111.253153-3.pdf [file supp_M111.253153_jbc.M111.253153-3.pdf]

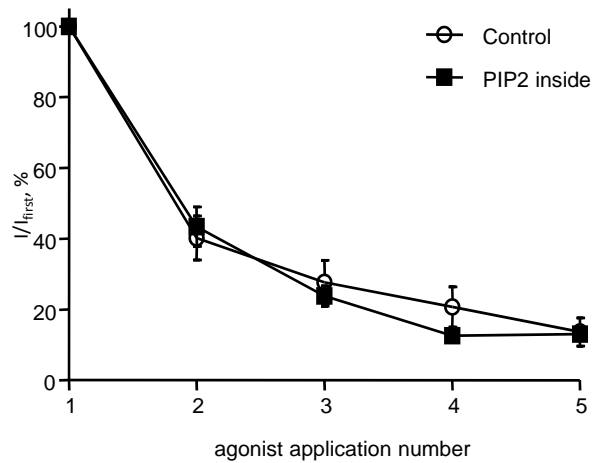

**Supplementary Figure 2. Intracellular PIP2 does not prevent P2X1 receptor mediated current run-down in the whole cell configuration.** Addition of PIP2 (5  $\mu$ M) into the pipette-filling solution did not change the rate of run-down of P2X1 receptor currents in the whole cell configuration (n=5). Currents were evoked by application of  $\alpha,\beta$ -meATP (10  $\mu$ M) every 5 minutes. PIP2 (Calbiochem) was dissolved in the internal pipette-filling solution by sonication for 15 min on ice.
