# Supplementary material for: Identification of Human P2X1 Receptor-interacting Proteins Reveals a Role of the Cytoskeleton in Receptor Regulation
Source: PubMed Central journal article supplement — J Biol Chem. 2011 Jul 7;286(35):30591–9. doi: 10.1074/jbc.M111.253153 (PMC3162419; doi:10.1074/jbc.m111.253153), 2011-07-07
Supplement: supp_M111.253153_jbc.M111.253153-4.pdf [file supp_M111.253153_jbc.M111.253153-4.pdf]

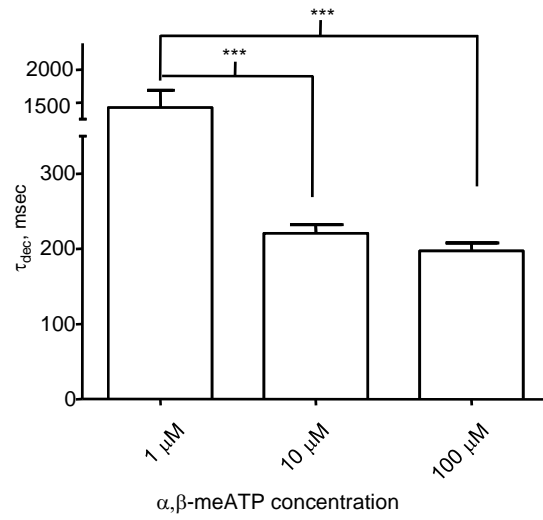

**Supplementary Figure 3. Concentration dependence of decay time constant for P2X1 receptor mediated currents.** Summary data of decay time constants of P2X1 receptor currents evoked by application of  $\alpha, \beta$ -meATP at different concentrations (n=9-18).
