# Supplementary material for: Identification of Human P2X1 Receptor-interacting Proteins Reveals a Role of the Cytoskeleton in Receptor Regulation
Source: PubMed Central journal article supplement — J Biol Chem. 2011 Jul 7;286(35):30591–9. doi: 10.1074/jbc.M111.253153 (PMC3162419; doi:10.1074/jbc.m111.253153), 2011-07-07
Supplement: supp_M111.253153_jbc.M111.253153-5.pdf [file supp_M111.253153_jbc.M111.253153-5.pdf]

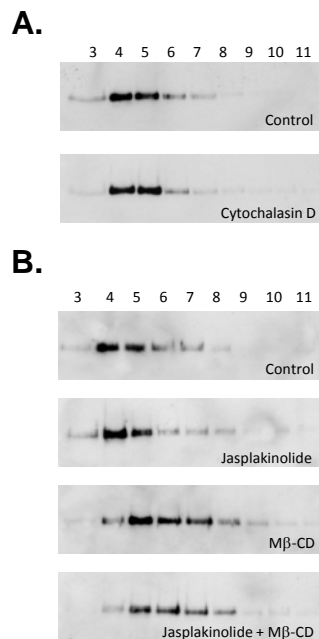

**Supplementary Figure 4. Effect of actin cytoskeleton manipulations on the lipid raft distribution of the P2X1 receptor.** **A.** Sucrose density centrifugation and Western blotting shows the P2X1 receptor is associated with buoyant lipid rafts. Blots show samples from successive 1 ml fractions taken following sucrose density centrifugation (for methods see Vial & Evans, 2005, *J. Biol. Chem.* 280, 30705-30711). The P2X1 receptor is detected predominantly in the buoyant lipid fractions towards the top of the gradient (fractions 4-5) as described previously. Treatment with cytochalasin D (500nM 1hr) had no effect on the distribution of the P2X1 receptor. Western blotting representative of 3 separate experiments. **B.** Representative blots of P2X1 receptor distribution after treatment with jasplakinolide (Jasp, 30 nM, 1hr), Methyl- $\beta$ -cyclodextrin (M $\beta$ -CD) (10 mM, 1 hr) or jasplakinolide together with Methyl- $\beta$ -cyclodextrin (Jasp, 30 nM, M $\beta$ -CD 10 mM 1hr) following pre-treatment with jasplakinolide (Jasp, 30 nM, 1hr). Western blotting representative of 4 separate experiments. Jasplakinolide had no effect on the association of the P2X1 receptor in the buoyant lipid rafts. However cholesterol depletion with M $\beta$ -CD resulted in a redistribution of the P2X1 receptor to lower fractions (6-8) as shown previously (Vial & Evans, 2005, *J. Biol. Chem.* 280, 30705-30711). This movement of the P2X1 receptor by M $\beta$ -CD was unaffected by jasplakinolide pre-treatment.
